# Supplementary material for: Computer Analysis of the Inhibition of ACE2 by Flavonoids and Identification of Their Potential Antiviral Pharmacophore Site
Source: MDPI journal article supplement (doi:10.3390/molecules28093766), 2023-04-27
Supplement: s1 [file s1]

# Computer Analysis Inhibition ACE2 by Flavonoids and Identification of their Potential Antiviral Pharmacophore Site

Andrey Bogoyavlenskiy <sup>1,\*</sup>, Madina Alexyuk <sup>1</sup>, Pavel Alexyuk <sup>1</sup>, Vladimir Berezin <sup>1</sup>,  
Faisal A. Almalki <sup>2</sup>, Taibi Ben Hadda <sup>2,3,\*</sup>, Alaa M. Alqahtani <sup>2</sup>, Saleh A. Ahmed <sup>4,5</sup>,  
Stefano Dall'Acqua <sup>6</sup>, Joazaizulfazli Jamalis <sup>7,\*</sup>

<sup>1</sup> Research and Production Center for Microbiology and Virology, Almaty 050010, Kazakhstan; madina.a06@gmail.com (M.A.); pagenal@bk.ru (P.A.); vberezin359@gmail.com (V.B.)

<sup>2</sup> Department of Pharmaceutical Chemistry, Faculty of Pharmacy, Umm Al-Qura University, Makkah 21955, Saudi Arabia; malkifaisal2@gmail.com (F.A.A.); amqahtani@uqu.edu.sa (A.M.A.)

<sup>3</sup> Laboratory of Applied Chemistry & Environment, Faculty of Sciences, Mohammed Premier University, MB 524, Oujda 60000, Morocco

<sup>4</sup> Department of Chemistry, Faculty of Applied Science, Umm Al-Qura University, Makkah 21955, Saudi Arabia; saahmed@uqu.edu.sa

<sup>5</sup> Department of Pharmaceutical and Pharmacological Sciences, University of Padova, Via Marzolo 5, 35121 Padova, Italy; stefano.dallacqua@unipd.it

<sup>6</sup> Department of Chemistry, Faculty of Science, Universiti Teknologi Malaysia, UTM, Johor Bahru 81310, Johor, Malaysia

\* Correspondence: anpav\_63@mail.ru (A.B.); taibi.ben.hadda@gmail.com (T.B.H.); joazaizulfazli@utm.my (J.J.)

**Table S1a** 2D and 3D visualization of ligand binding to the protein under study.

| № | Compound     | Visualization ACE2 + compound in PyMol                                               |
|---|--------------|--------------------------------------------------------------------------------------|
| 1 | Rhamnetin    | 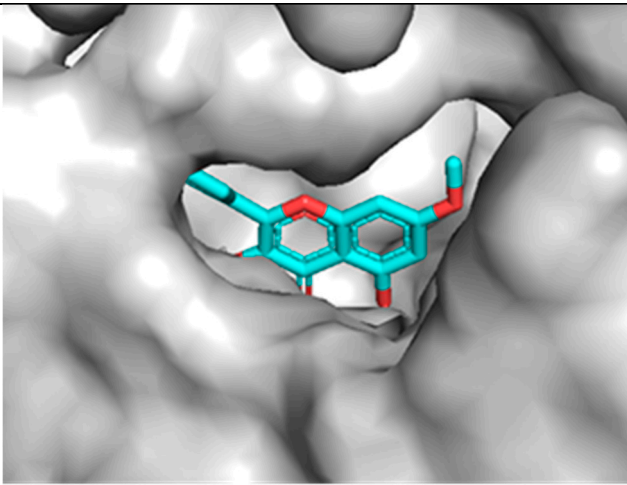   |
| 2 | Patuletin    |   |
| 3 | Isorhamnetin |  |

4 Tamarixetin

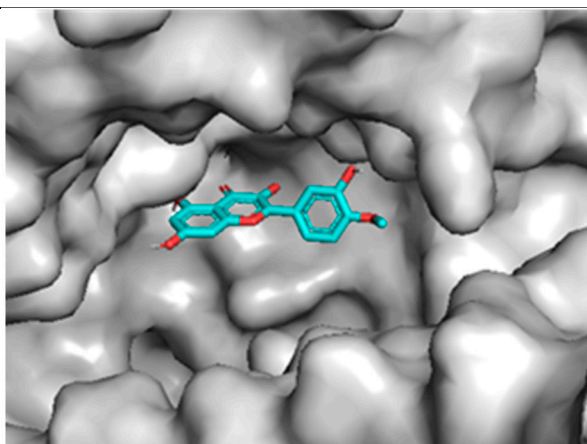

5 Quercetin

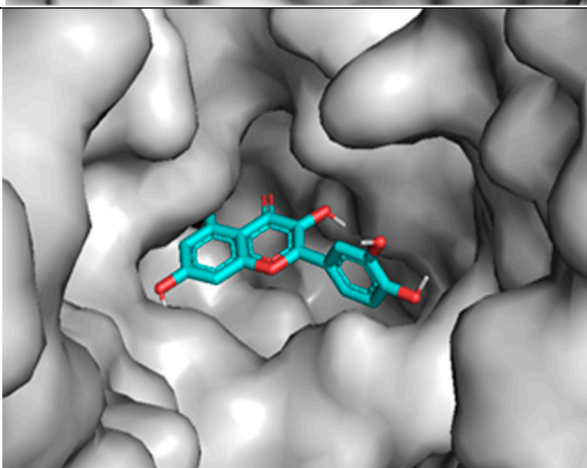

6 Corniculatus  
in

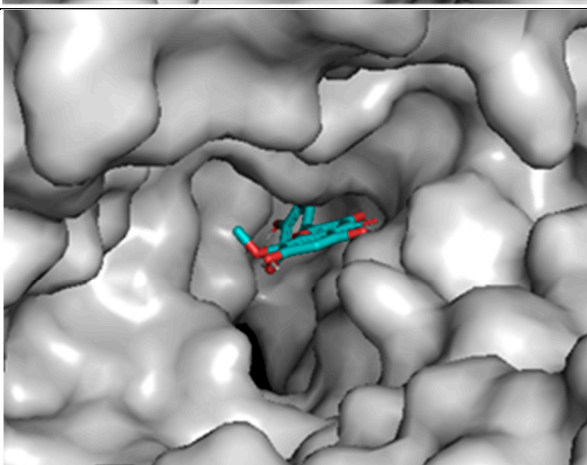

7 Dillenetin

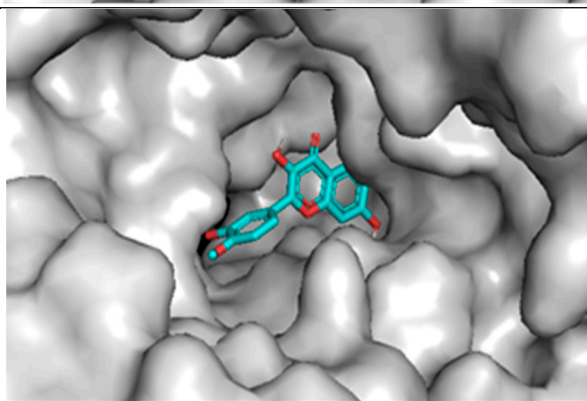

8 Nobiletin

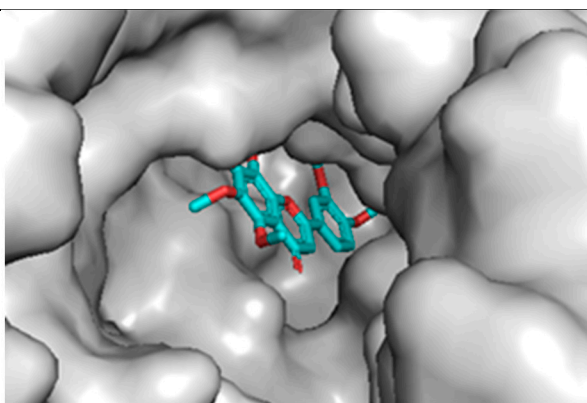

9 Hesperidin

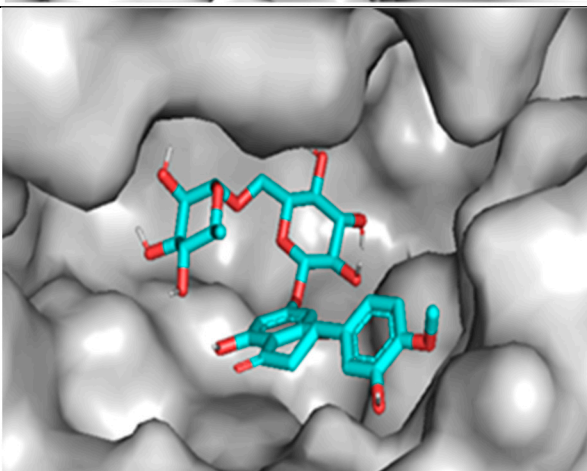

10 Baicalein

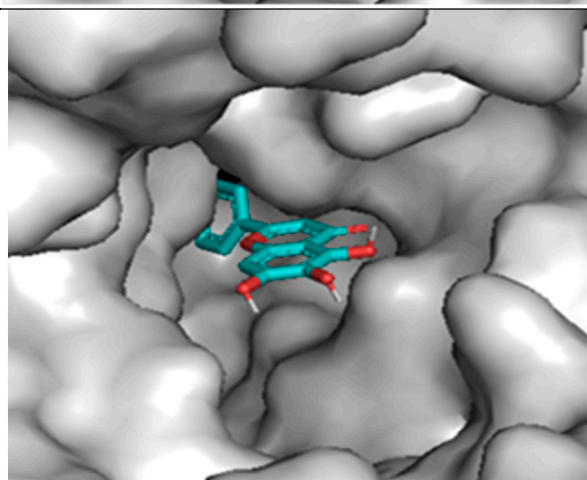

11 Ayanin

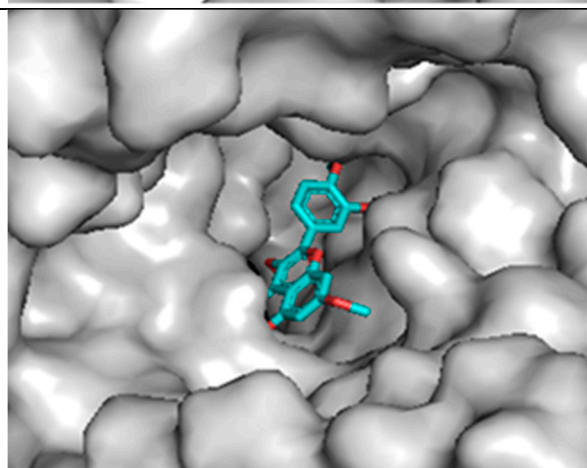



12 Azaleatin

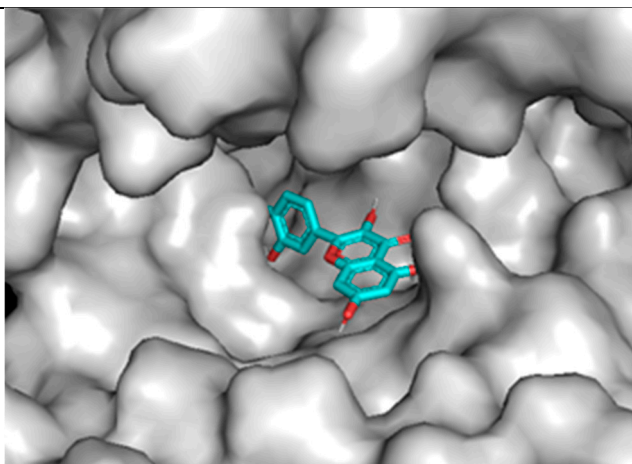

13 Ombuin

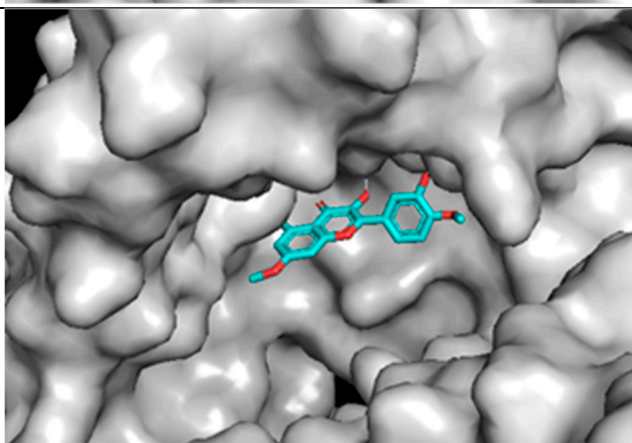

14 Pachypodol

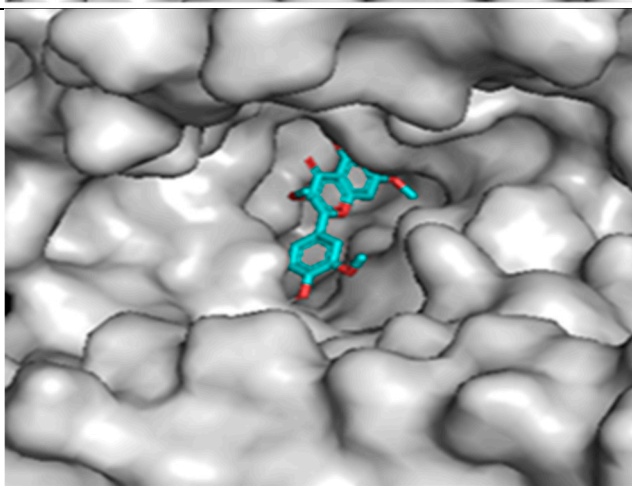

15 Retusin

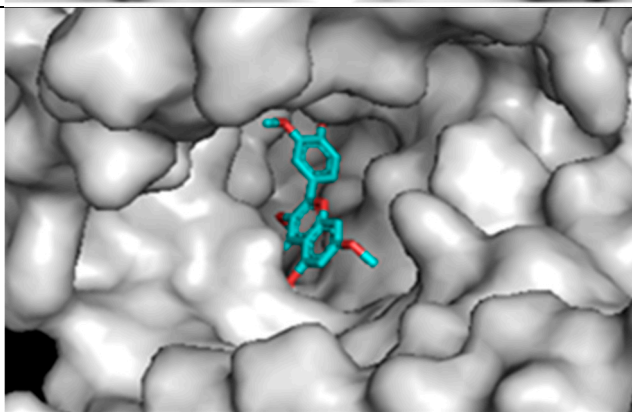

|    |             |                                                                                     |
|----|-------------|-------------------------------------------------------------------------------------|
| 16 | Rhamnazin   | 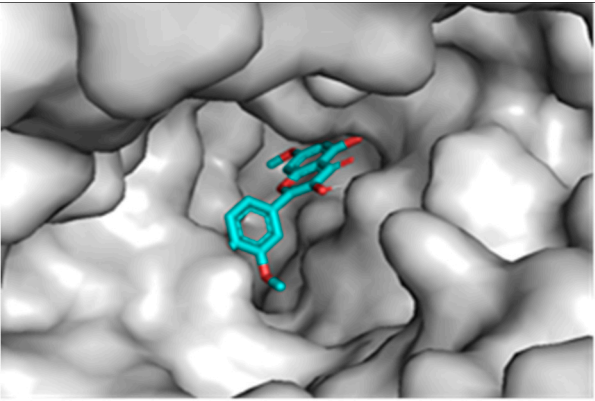  |
| 17 | Eupatolitin |  |

**Table S1b** 2D and 3D visualization of ligand binding to the protein under study.

| № | Compound  | Visualization ACE2 + compound in LigPlot <sup>+</sup>                                |
|---|-----------|--------------------------------------------------------------------------------------|
| 1 | Rhamnetin | 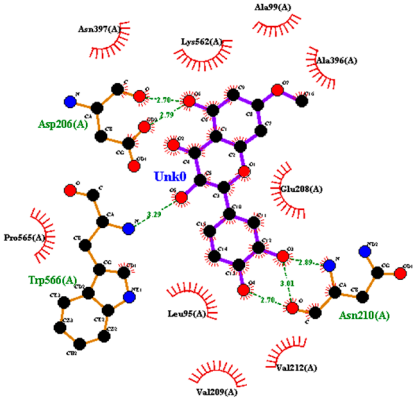 |

2 Patuletin

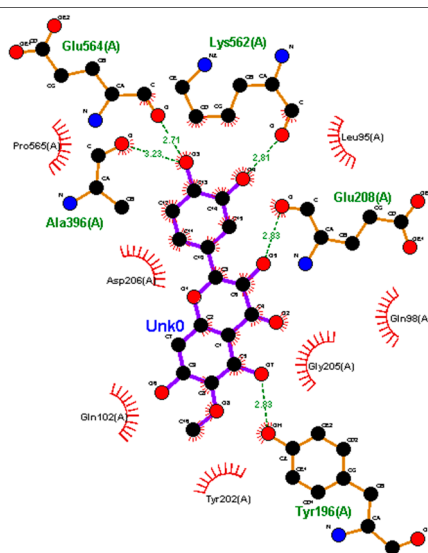

2

3 Isorhamnetin

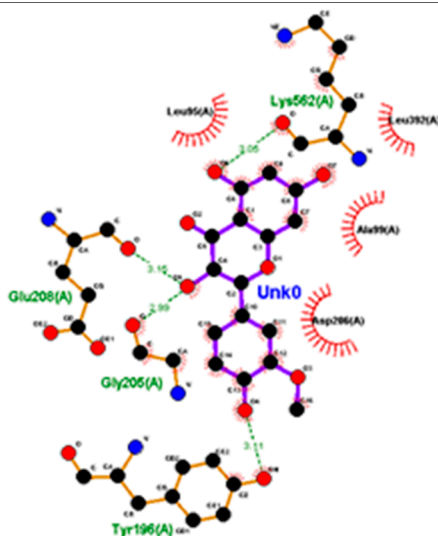

3

4 Tamarixetin

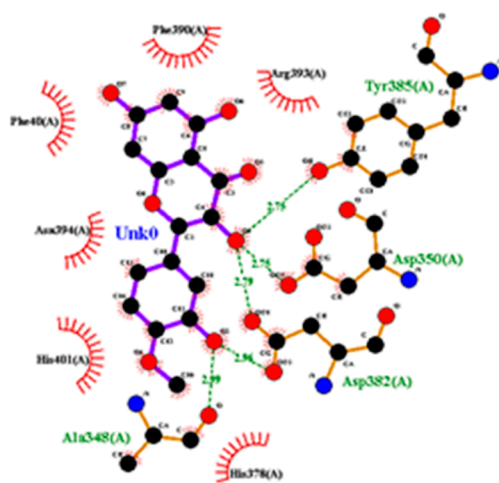

4

5 Quercetin

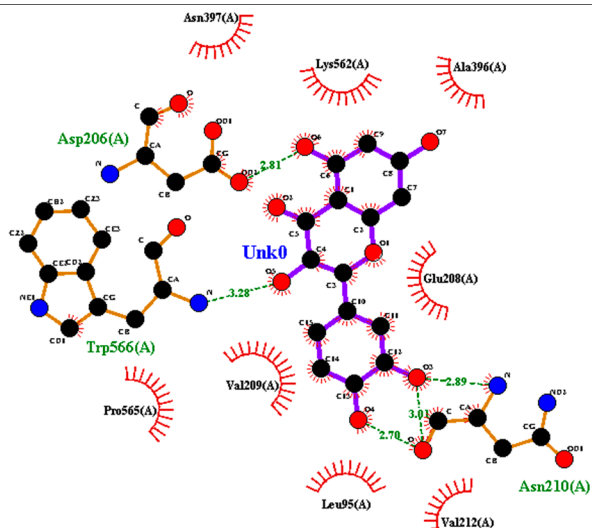

5

6 Corniculatus in

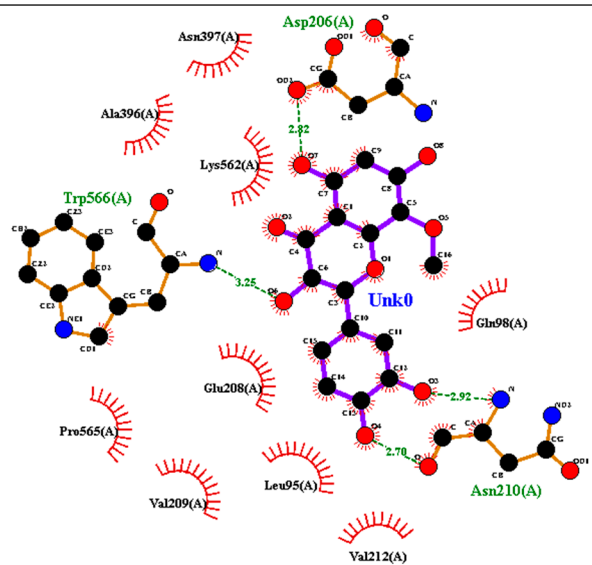

6

7 Dillenetin

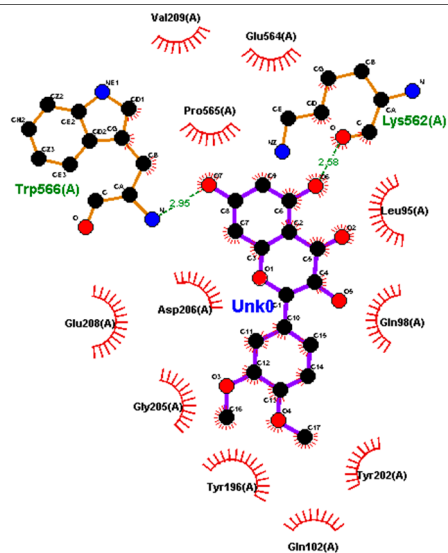

8 Nobiletin

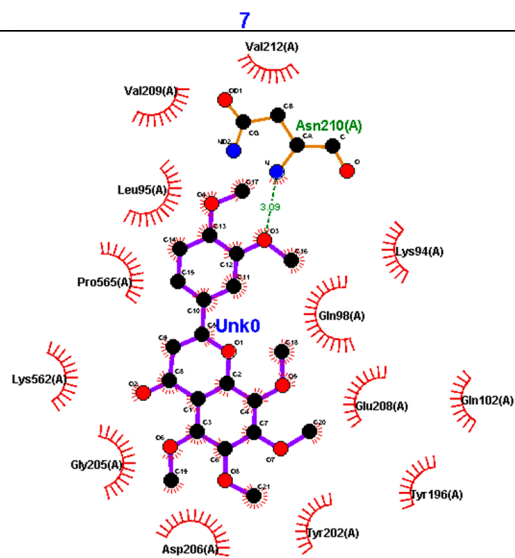

[illegible]

10 Baicalein

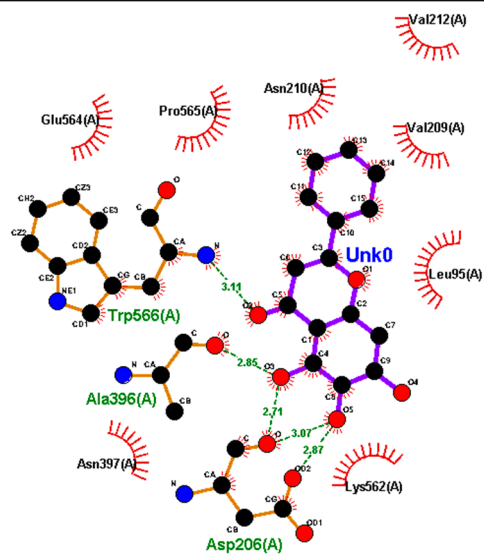

10



11 Ayanin

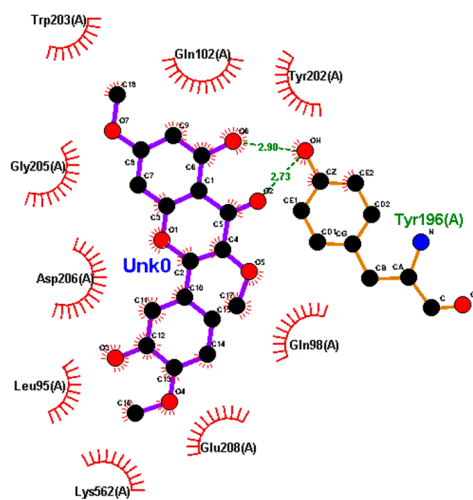

11

12 Azaleatin

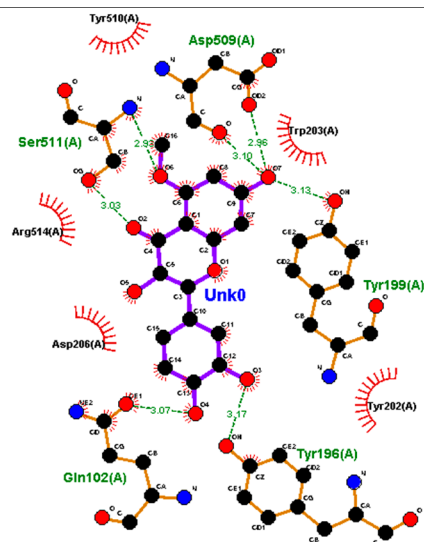

12

13 Ombuin

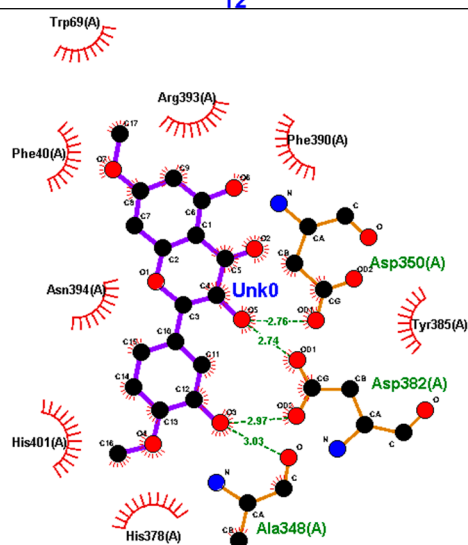

13

14 Pachypodol

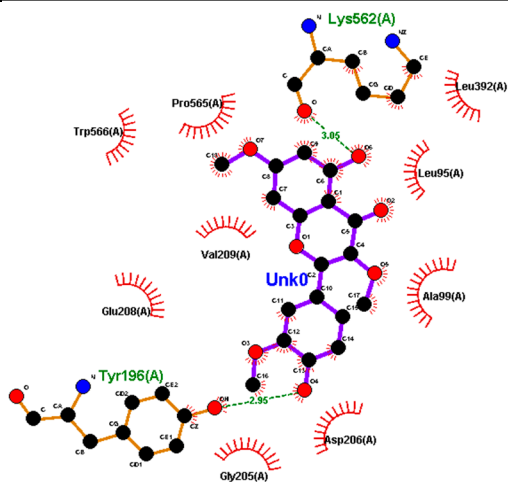

14

15 Retusin

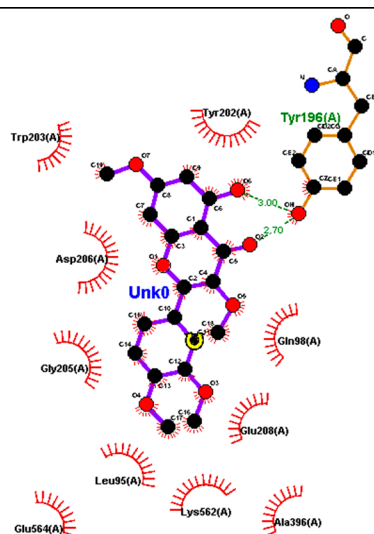

15

16 Rhamnazin

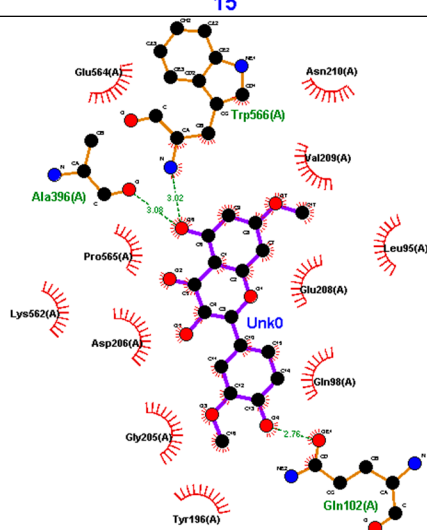

16

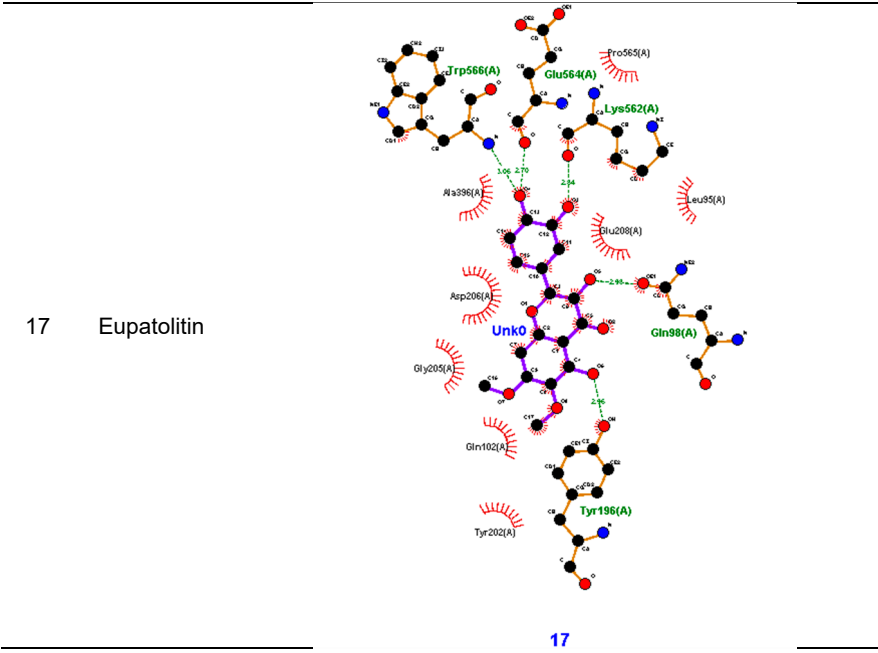

Table S1c 2D and 3D visualization of ligand binding to the protein under study.

| No | Compound  | Visualization ACE2 + compound in RasMol |
|----|-----------|-----------------------------------------|
| 1  | Rhamnetin |                                         |

2 Patuletin

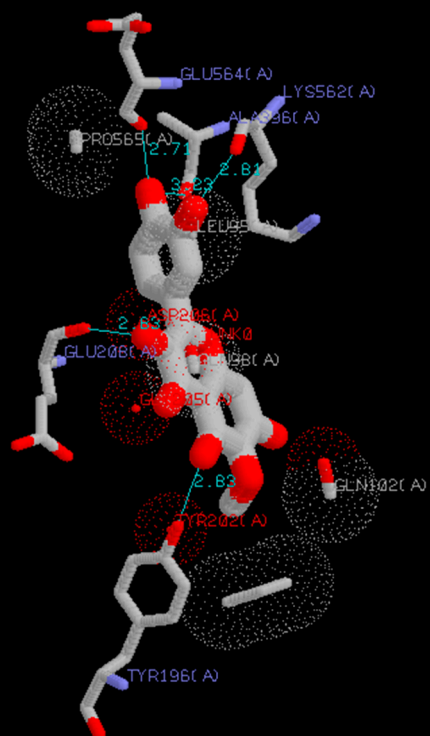

3 Isorhamnetin

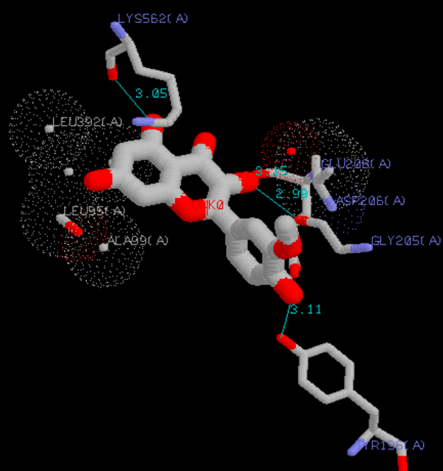

4 Tamarixetin

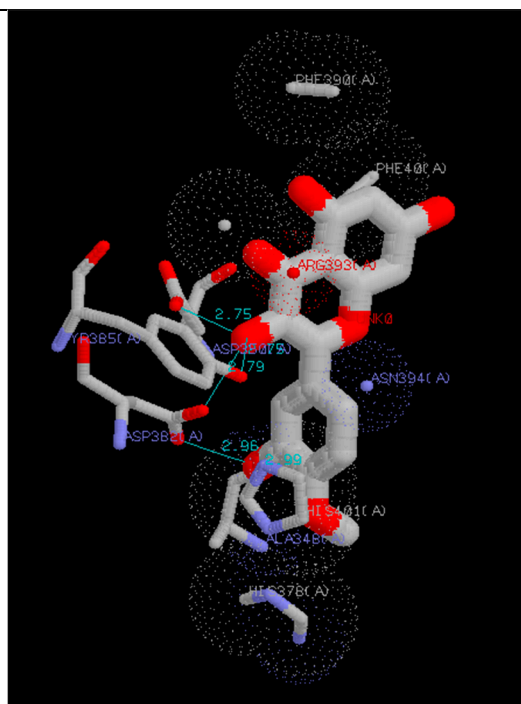

5 Quercetin

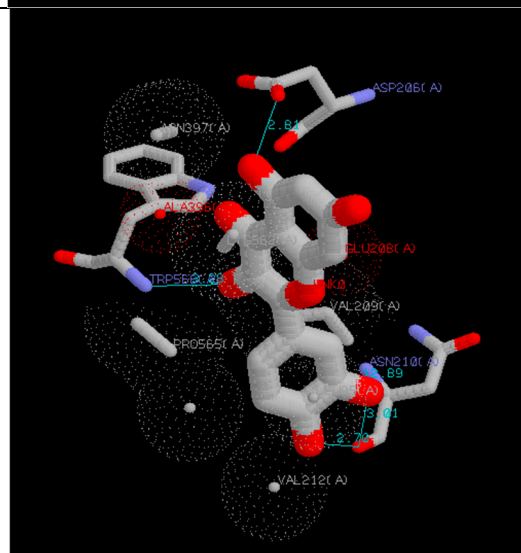

6 Corniculatus in

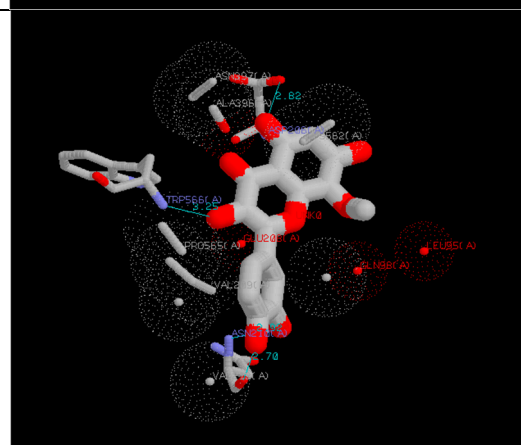

|   |                                                                                                                                                           |
|---|-----------------------------------------------------------------------------------------------------------------------------------------------------------|
| 7 | <div data-bbox="491 481 590 510" data-label="Caption">Dillenetin</div> 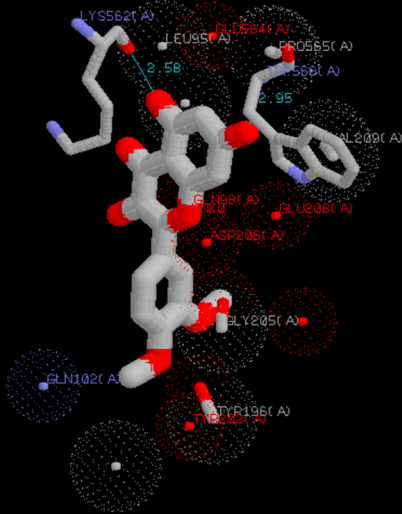 |
|---|-----------------------------------------------------------------------------------------------------------------------------------------------------------|



|    |           |                                                                                      |
|----|-----------|--------------------------------------------------------------------------------------|
| 10 | Baicalein | 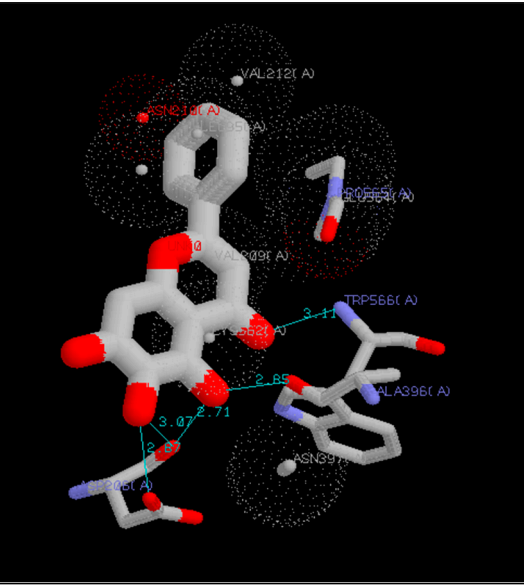   |
| 11 | Ayanin    |   |
| 12 | Azaleatin |  |

13 Ombuin

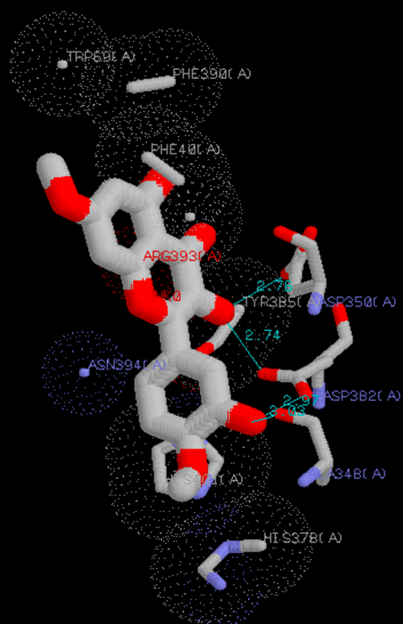

14 Pachypodol

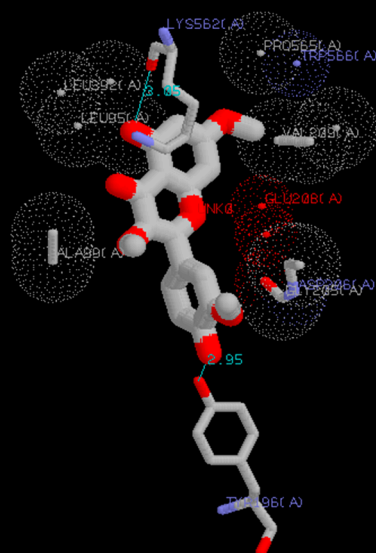

15 Retusin

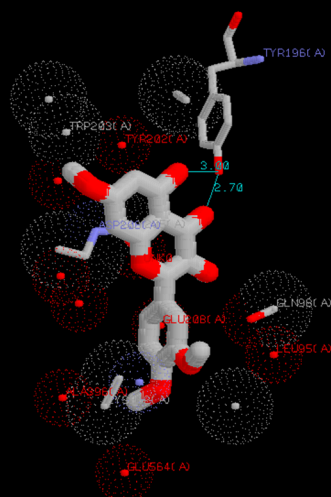

16 Rhamnazin

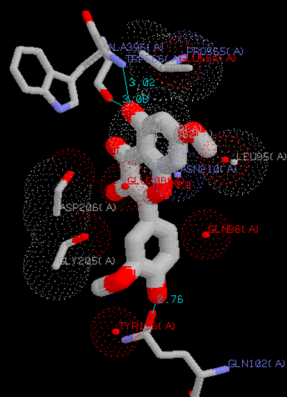

17 Eupatolitin

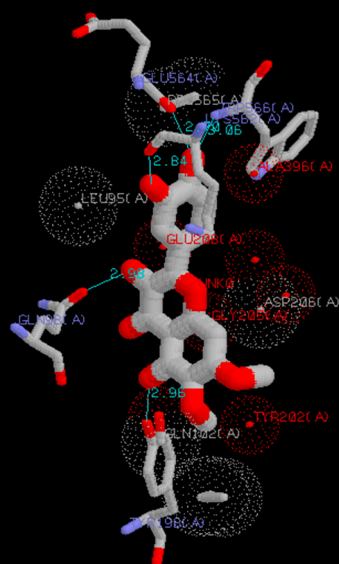

**Table S2** Comparison of Toxicity Risks and Drug Score of compounds **1-17**.

| Compound | MW<br>[g/mole] | Toxicity Risks <sup>[a]</sup>                                                       |                                                                                     |                                                                                     |                                                                                     | Drug Score Calculations <sup>[b]</sup> |       |      |      |
|----------|----------------|-------------------------------------------------------------------------------------|-------------------------------------------------------------------------------------|-------------------------------------------------------------------------------------|-------------------------------------------------------------------------------------|----------------------------------------|-------|------|------|
|          |                | MUT                                                                                 | TUM                                                                                 | IRRI                                                                                | REP                                                                                 | cLogP                                  | cLogS | DL   | DS   |
| 1        | 316.26         |    |    |    |    | 1.77                                   | -2.8  | 1.7  | 0.49 |
| 2        | 332.26         |    |    |    |    | 1.42                                   | -2.51 | 1.5  | 0.49 |
| 3        | 316.26         |    |    |    |    | 1.77                                   | -2.8  | 1.17 | 0.47 |
| 4        | 316.26         |    |    |    |    | 1.77                                   | -2.8  | 1.78 | 0.49 |
| 5        | 302.24         |    |    |    |    | 1.49                                   | -2.49 | 1.6  | 0.3  |
| 6        | 332.26         |    |    |    |    | 1.42                                   | -2.51 | 1.5  | 0.49 |
| 7        | 330.29         |    |    |    |    | 2.04                                   | -3.12 | 3.0  | 0.5  |
| 8        | 418.40         |    |    |    |    | 2.45                                   | -3.87 | 2.77 | 0.26 |
| 9        | 610.57         |    |    |    |    | -0.81                                  | -2.75 | 3.46 | 0.57 |
| 10       | 270.24         |    |    |    |    | 2.34                                   | -2.86 | 0.75 | 0.75 |
| 11       | 344.32         |    |    |    |    | 2.47                                   | -3.25 | 1.65 | 0.46 |
| 12       | 316.26         |   |   |   |   | 2.04                                   | -3.12 | 2.0  | 0.48 |
| 13       | 330.29         |  |  |  |  | 2.04                                   | -3.12 | 1.78 | 0.48 |
| 14       | 344.32         |  |  |  |  | 2.47                                   | -3.25 | 1.03 | 0.43 |
| 15       | 358.35         |  |  |  |  | 2.75                                   | -3.56 | 2.88 | 0.46 |
| 16       | 330.29         |  |  |  |  | 2.04                                   | -3.12 | 1.17 | 0.45 |
| 17       | 346.29         |  |  |  |  | 1.7                                    | -2.82 | 1.5  | 0.47 |

<sup>[a]</sup> Not toxic () , highly toxic: () , slightly toxic: () . REP: Reproductive effective, IRRIT: Irritant, TUM: Tumorigenic, MUT: Mutagenic. <sup>[b]</sup> DS: Drug-Score, DL: Drug Likeness, Sol: Solubility.

**Table S3** Molinspiration calculations for compounds **1-17**.

| Co | 3D Molecular Structure                                                              | Molecular properties | Drug scores             |       |
|----|-------------------------------------------------------------------------------------|----------------------|-------------------------|-------|
| 1  | 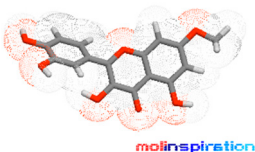 | <u>miLogP</u> 2.22   | GPCR ligand             | -0.11 |
|    |                                                                                     | <u>TPSA</u> 120.36   | Ion channel modulator   | -0.27 |
|    |                                                                                     | MW 316.26            | Kinase inhibitor        | 0.21  |
|    |                                                                                     | nOHNH 4              | Nuclear receptor ligand | 0.27  |
|    |                                                                                     | nviolations 0        | Protease inhibitor      | -0.27 |
|    |                                                                                     | <u>volume</u> 257.61 | Enzyme inhibitor        | 0.20  |
|    |                                                                                     |                      |                         |       |

|   |                                                                                     |               |        |                         |       |
|---|-------------------------------------------------------------------------------------|---------------|--------|-------------------------|-------|
| 2 | 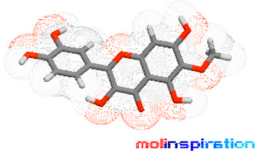   | <u>miLogP</u> | 1.70   |                         |       |
|   |                                                                                     | <u>TPSA</u>   | 140.59 | GPCR ligand             | -0.14 |
|   |                                                                                     | MW            | 332.26 | Ion channel modulator   | -0.34 |
|   |                                                                                     | nOHNH         | 5      | Kinase inhibitor        | 0.21  |
|   |                                                                                     | nviolations   | 0      | Nuclear receptor ligand | 0.13  |
|   |                                                                                     | nrotb         | 2      | Protease inhibitor      | -0.35 |
|   |                                                                                     | <u>volume</u> | 265.63 | Enzyme inhibitor        | 0.17  |
| 3 |    | <u>miLogP</u> | 1.99   | GPCR ligand             | -0.10 |
|   |                                                                                     | <u>TPSA</u>   | 120.36 | Ion channel modulator   | -0.26 |
|   |                                                                                     | MW            | 316.26 | Kinase inhibitor        | 0.25  |
|   |                                                                                     | nOHNH         | 4      | Nuclear receptor ligand | 0.28  |
|   |                                                                                     | nviolations   | 0      | Protease inhibitor      | -0.30 |
|   |                                                                                     | <u>volume</u> | 257.61 | Enzyme inhibitor        | 0.22  |
| 4 |    | <u>miLogP</u> | 1.99   | GPCR ligand             | -0.10 |
|   |                                                                                     | <u>TPSA</u>   | 120.36 | Ion channel modulator   | -0.26 |
|   |                                                                                     | MW            | 316.26 | Kinase inhibitor        | 0.25  |
|   |                                                                                     | nOHNH         | 4      | Nuclear receptor ligand | 0.28  |
|   |                                                                                     | nviolations   | 0      | Protease inhibitor      | -0.30 |
|   |                                                                                     | <u>volume</u> | 257.61 | Enzyme inhibitor        | 0.22  |
| 5 |  | <u>miLogP</u> | 1.68   | GPCR ligand             | -0.06 |
|   |                                                                                     | <u>TPSA</u>   | 131.35 | Ion channel modulator   | -0.19 |
|   |                                                                                     | MW            | 302.24 | Kinase inhibitor        | 0.28  |
|   |                                                                                     | nOHNH         | 5      | Nuclear receptor ligand | 0.36  |
|   |                                                                                     | nviolations   | 0      | Protease inhibitor      | -0.25 |
|   |                                                                                     | <u>volume</u> | 240.08 | Enzyme inhibitor        | 0.28  |
| 6 |  | <u>miLogP</u> | 1.70   | GPCR ligand             | -0.15 |
|   |                                                                                     | <u>TPSA</u>   | 140.59 | Ion channel modulator   | -0.12 |
|   |                                                                                     | MW            | 332.26 | Kinase inhibitor        | 0.17  |
|   |                                                                                     | nOHNH         | 5      | Nuclear receptor ligand | 0.15  |
|   |                                                                                     | nviolations   | 0      | Protease inhibitor      | -0.29 |
|   |                                                                                     | <u>volume</u> | 265.63 | Enzyme inhibitor        | 0.22  |
| 7 |  | <u>miLogP</u> | 2.30   | GPCR ligand             | -0.10 |
|   |                                                                                     | <u>TPSA</u>   | 109.36 | Ion channel modulator   | -0.26 |
|   |                                                                                     | MW            | 330.29 | Kinase inhibitor        | 0.23  |
|   |                                                                                     | nOHNH         | 3      | Nuclear receptor ligand | 0.27  |
|   |                                                                                     | nviolations   | 0      | Protease inhibitor      | -0.26 |
|   |                                                                                     | <u>volume</u> | 275.14 | Enzyme inhibitor        | 0.19  |
| 8 |  | <u>miLogP</u> | 3.08   | GPCR ligand             | -0.15 |
|   |                                                                                     | <u>TPSA</u>   | 105.84 | Ion channel modulator   | -0.10 |
|   |                                                                                     | MW            | 418.40 | Kinase inhibitor        | 0.11  |
|   |                                                                                     | nOHNH         | 1      | Nuclear receptor ligand | 0.03  |
|   |                                                                                     |               |        | Protease inhibitor      | -0.26 |

|    |                                                                                     |                                                                                       |                                                                                                                               |                                                  |
|----|-------------------------------------------------------------------------------------|---------------------------------------------------------------------------------------|-------------------------------------------------------------------------------------------------------------------------------|--------------------------------------------------|
|    |                                                                                     | nviolations 0<br>volume 361.29                                                        | Enzyme inhibitor                                                                                                              | 0.15                                             |
| 9  | 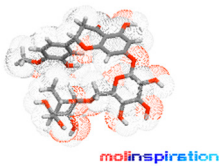   | miLogP -0.55<br>TPSA 234.30<br>MW 610.57<br>nOHNH 8<br>nviolations 3<br>volume 511.79 | GPCR ligand<br>Ion channel modulator<br>Kinase inhibitor<br>Nuclear receptor ligand<br>Protease inhibitor<br>Enzyme inhibitor | -0.01<br>-0.59<br>-0.36<br>-0.20<br>0.00<br>0.06 |
| 10 |    | miLogP 2.68<br>TPSA 90.89<br>MW 270.24<br>nOHNH 3<br>nviolations 0<br>volume 224.05   | GPCR ligand<br>Ion channel modulator<br>Kinase inhibitor<br>Nuclear receptor ligand<br>Protease inhibitor<br>Enzyme inhibitor | -0.12<br>-0.18<br>0.19<br>0.17<br>-0.35<br>0.26  |
| 11 |   | miLogP 2.80<br>TPSA 98.37<br>MW 344.32<br>nOHNH 2<br>nviolations 0<br>volume 292.67   | GPCR ligand<br>Ion channel modulator<br>Kinase inhibitor<br>Nuclear receptor ligand<br>Protease inhibitor<br>Enzyme inhibitor | -0.12<br>-0.22<br>0.14<br>0.14<br>-0.27<br>0.16  |
| 12 |  | miLogP 1.96<br>TPSA 120.36<br>MW 316.26<br>nOHNH 4<br>nviolations 0<br>volume 275.61  | GPCR ligand<br>Ion channel modulator<br>Kinase inhibitor<br>Nuclear receptor ligand<br>Protease inhibitor<br>Enzyme inhibitor | -0.07<br>-0.24<br>0.24<br>0.29<br>-0.28<br>0.19  |
| 13 |  | miLogP 2.53<br>TPSA 109.36<br>MW 330.29<br>nOHNH 3<br>nviolations 0<br>volume 275.14  | GPCR ligand<br>Ion channel modulator<br>Kinase inhibitor<br>Nuclear receptor ligand<br>Protease inhibitor<br>Enzyme inhibitor | -0.12<br>-0.28<br>0.21<br>0.23<br>-0.27<br>0.18  |
| 14 |  | miLogP 2.80<br>TPSA 98.37<br>MW 344.32<br>nOHNH 2<br>nviolations 0<br>volume 292.67   | GPCR ligand<br>Ion channel modulator<br>Kinase inhibitor<br>Nuclear receptor ligand<br>Protease inhibitor<br>Enzyme inhibitor | -0.12<br>-0.22<br>0.14<br>0.14<br>-0.27<br>0.16  |



|    |                                                                                   |               |        |                         |       |
|----|-----------------------------------------------------------------------------------|---------------|--------|-------------------------|-------|
| 15 | 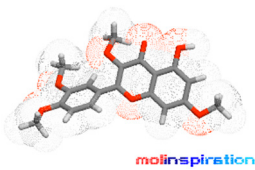 | <u>miLogP</u> | 3.11   | GPCR ligand             | -0.13 |
|    |                                                                                   | <u>TPSA</u>   | 87.38  | Ion channel modulator   | -0.22 |
|    |                                                                                   | MW            | 358.35 | Kinase inhibitor        | 0.12  |
|    |                                                                                   | nOHNH         | 1      | Nuclear receptor ligand | 0.13  |
|    |                                                                                   | nviolations   | 0      | Protease inhibitor      | -0.25 |
|    |                                                                                   | <u>volume</u> | 310.20 | Enzyme inhibitor        | 0.14  |
| 16 |  | <u>miLogP</u> | 2.53   | GPCR ligand             | -0.12 |
|    |                                                                                   | <u>TPSA</u>   | 109.36 | Ion channel modulator   | -0.28 |
|    |                                                                                   | MW            | 330.29 | Kinase inhibitor        | 0.21  |
|    |                                                                                   | nOHNH         | 3      | Nuclear receptor ligand | 0.23  |
|    |                                                                                   | nviolations   | 0      | Protease inhibitor      | -0.27 |
|    |                                                                                   | <u>volume</u> | 275.14 | Enzyme inhibitor        | 0.18  |
| 17 |  | <u>miLogP</u> | 2.01   | GPCR ligand             | -0.15 |
|    |                                                                                   | <u>TPSA</u>   | 129.59 | Ion channel modulator   | -0.34 |
|    |                                                                                   | MW            | 346.29 | Kinase inhibitor        | 0.21  |
|    |                                                                                   | nOHNH         | 4      | Nuclear receptor ligand | 0.09  |
|    |                                                                                   | nviolations   | 0      | Protease inhibitor      | -0.35 |
|    |                                                                                   | <u>volume</u> | 283.16 | Enzyme inhibitor        | 0.15  |

Molecular weight in g/mol

Topological polar surface area in Å<sup>2</sup>

Volume in Å<sup>3</sup>

**Table S4** Comparison of Molinspiration data for compounds 1-17.

| Compd | Lipinski parameters calculations <sup>[a]</sup> |      |    |        | Drug-likeness <sup>[b]</sup> |       |      |       |       |      |
|-------|-------------------------------------------------|------|----|--------|------------------------------|-------|------|-------|-------|------|
|       | TPSA                                            | NONH | NV | VOL    | GPCRL                        | ICM   | KI   | NRL   | PI    | EI   |
| 1     | 120.36                                          | 4    | 0  | 257.61 | -0.11                        | -0.27 | 0.21 | 0.27  | -0.27 | 0.20 |
| 2     | 140.59                                          | 5    | 0  | 265.63 | -0.14                        | -0.34 | 0.21 | 0.13  | -0.35 | 0.17 |
| 3     | 120.36                                          | 4    | 0  | 257.61 | -0.10                        | -0.26 | 0.25 | 0.28  | -0.30 | 0.22 |
| 4     | 120.36                                          | 4    | 0  | 257.61 | -0.10                        | -0.26 | 0.25 | 0.28  | -0.30 | 0.22 |
| 5     | 131.35                                          | 5    | 0  | 240.08 | -0.06                        | -0.19 | 0.28 | 0.36  | -0.25 | 0.28 |
| 6     | 140.59                                          | 5    | 0  | 265.63 | -0.15                        | -0.12 | 0.17 | 0.15  | -0.29 | 0.22 |
| 7     | 109.36                                          | 3    | 0  | 275.14 | 0.10                         | -0.26 | 0.23 | 0.27  | -0.26 | 0.19 |
| 8     | 105.84                                          | 1    | 0  | 361.29 | -0.15                        | -0.10 | 0.11 | 0.03  | -0.26 | 0.15 |
| 9     | 234.30                                          | 8    | 3  | 511.79 | -0.01                        | -0.59 | 0.36 | -0.20 | 0.00  | 0.06 |
| 10    | 90.89                                           | 3    | 0  | 224.05 | -0.12                        | -0.18 | 0.19 | 0.17  | -0.35 | 0.26 |

|    |        |   |   |        |       |       |      |      |       |      |
|----|--------|---|---|--------|-------|-------|------|------|-------|------|
| 11 | 98.37  | 2 | 0 | 292.67 | -0.12 | -0.22 | 0.14 | 0.14 | -0.27 | 0.16 |
| 12 | 120.36 | 4 | 0 | 275.61 | -0.07 | -0.24 | 0.24 | 0.29 | -0.28 | 0.19 |
| 13 | 109.36 | 3 | 0 | 275.14 | -0.12 | -0.28 | 0.21 | 0.23 | -0.27 | 0.18 |
| 14 | 98.37  | 2 | 0 | 292.67 | -0.12 | -0.22 | 0.14 | 0.14 | -0.27 | 0.16 |
| 15 | 87.38  | 1 | 0 | 310.20 | -0.13 | -0.22 | 0.12 | 0.13 | -0.25 | 0.14 |
| 16 | 109.36 | 3 | 0 | 275.14 | -0.12 | -0.28 | 0.21 | 0.23 | -0.27 | 0.18 |
| 17 | 129.59 | 4 | 0 | 283.16 | -0.15 | -0.34 | 0.21 | 0.09 | -0.35 | 0.15 |

Molecular weight in g/mol

Topological polar surface area in Å<sup>2</sup>

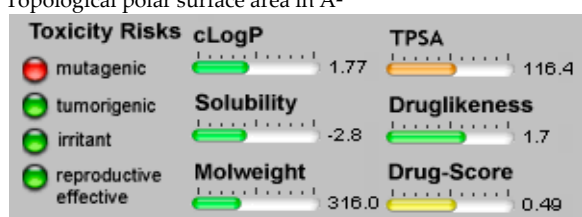

Compound 1

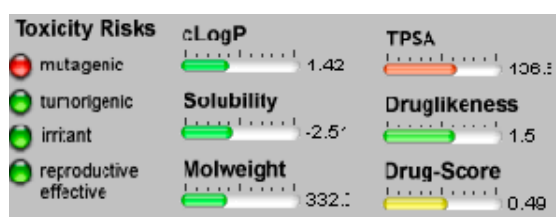

Compound 2

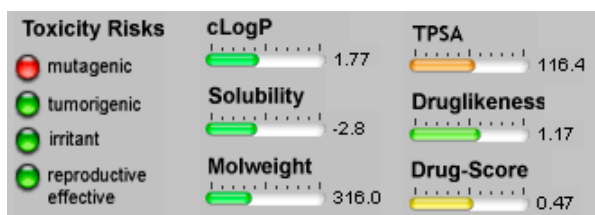

Compound 3

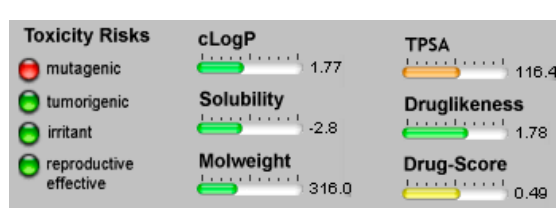

Compound 4

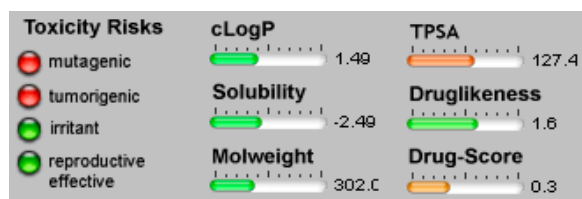

Compound 5

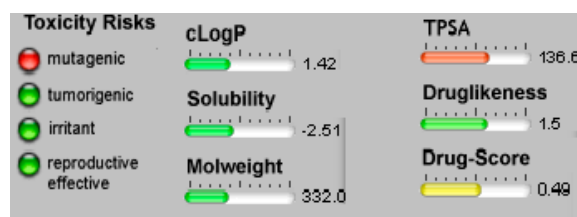

Compound 6

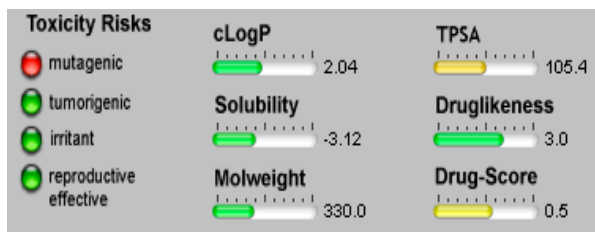

Compound 7

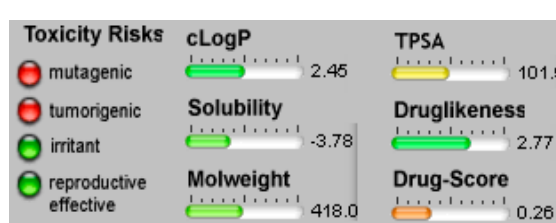

Compound 8

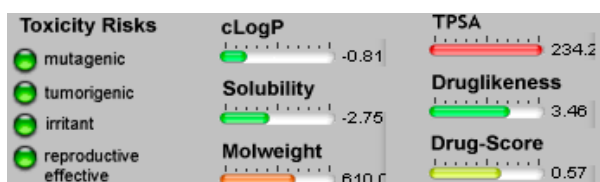

Compound 9

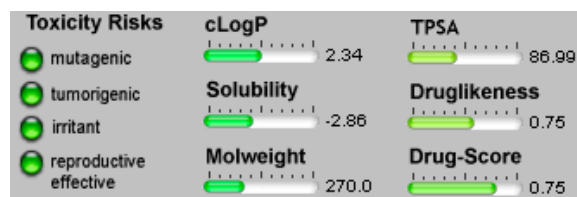

Compound 10

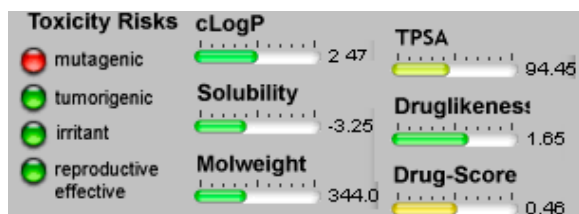

Compound 11

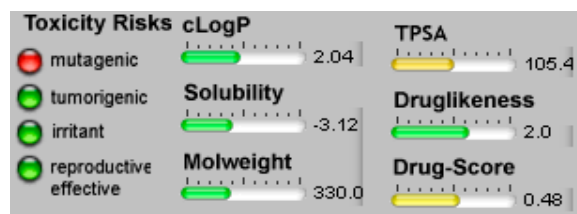

Compound 12

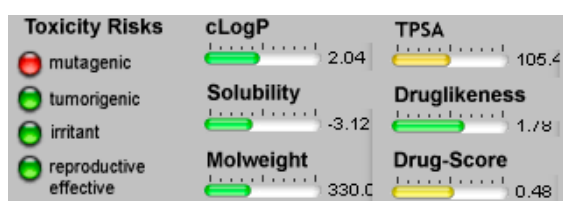

Compound 13

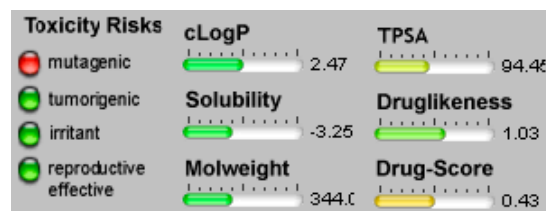

Compound 14

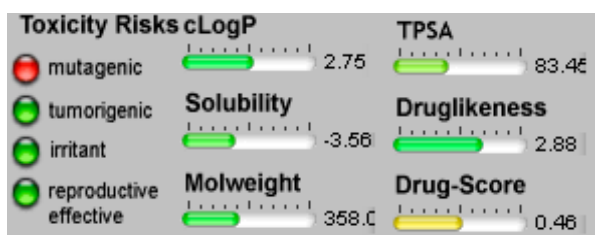

Compound 15

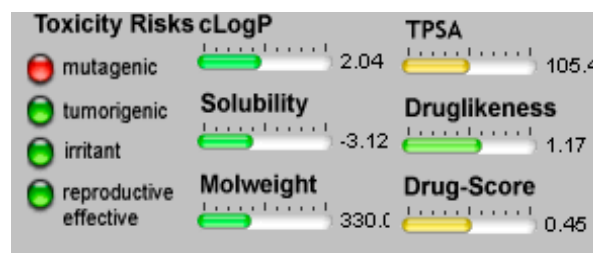

Compound 16

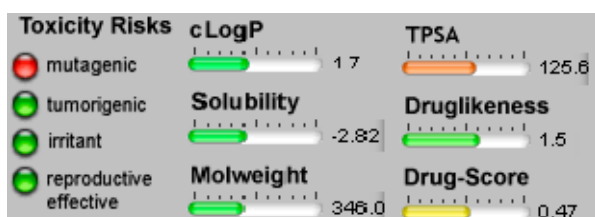

Compound 17

Not toxic ( ), highly toxic: ( ),

slightly toxic: ( ). REP: Reproductive effective, IRRIT: Irritant, TUM: Tumorigenic, MUT: Mutagenic.

**Drug-Scores:**

DS: Drug-Score, DL: Drug Likeness, Sol: Solubility.

**Toxicity Risks**

Figure S1. Osiris calculations of likeness and drug-score of compounds (1-17).

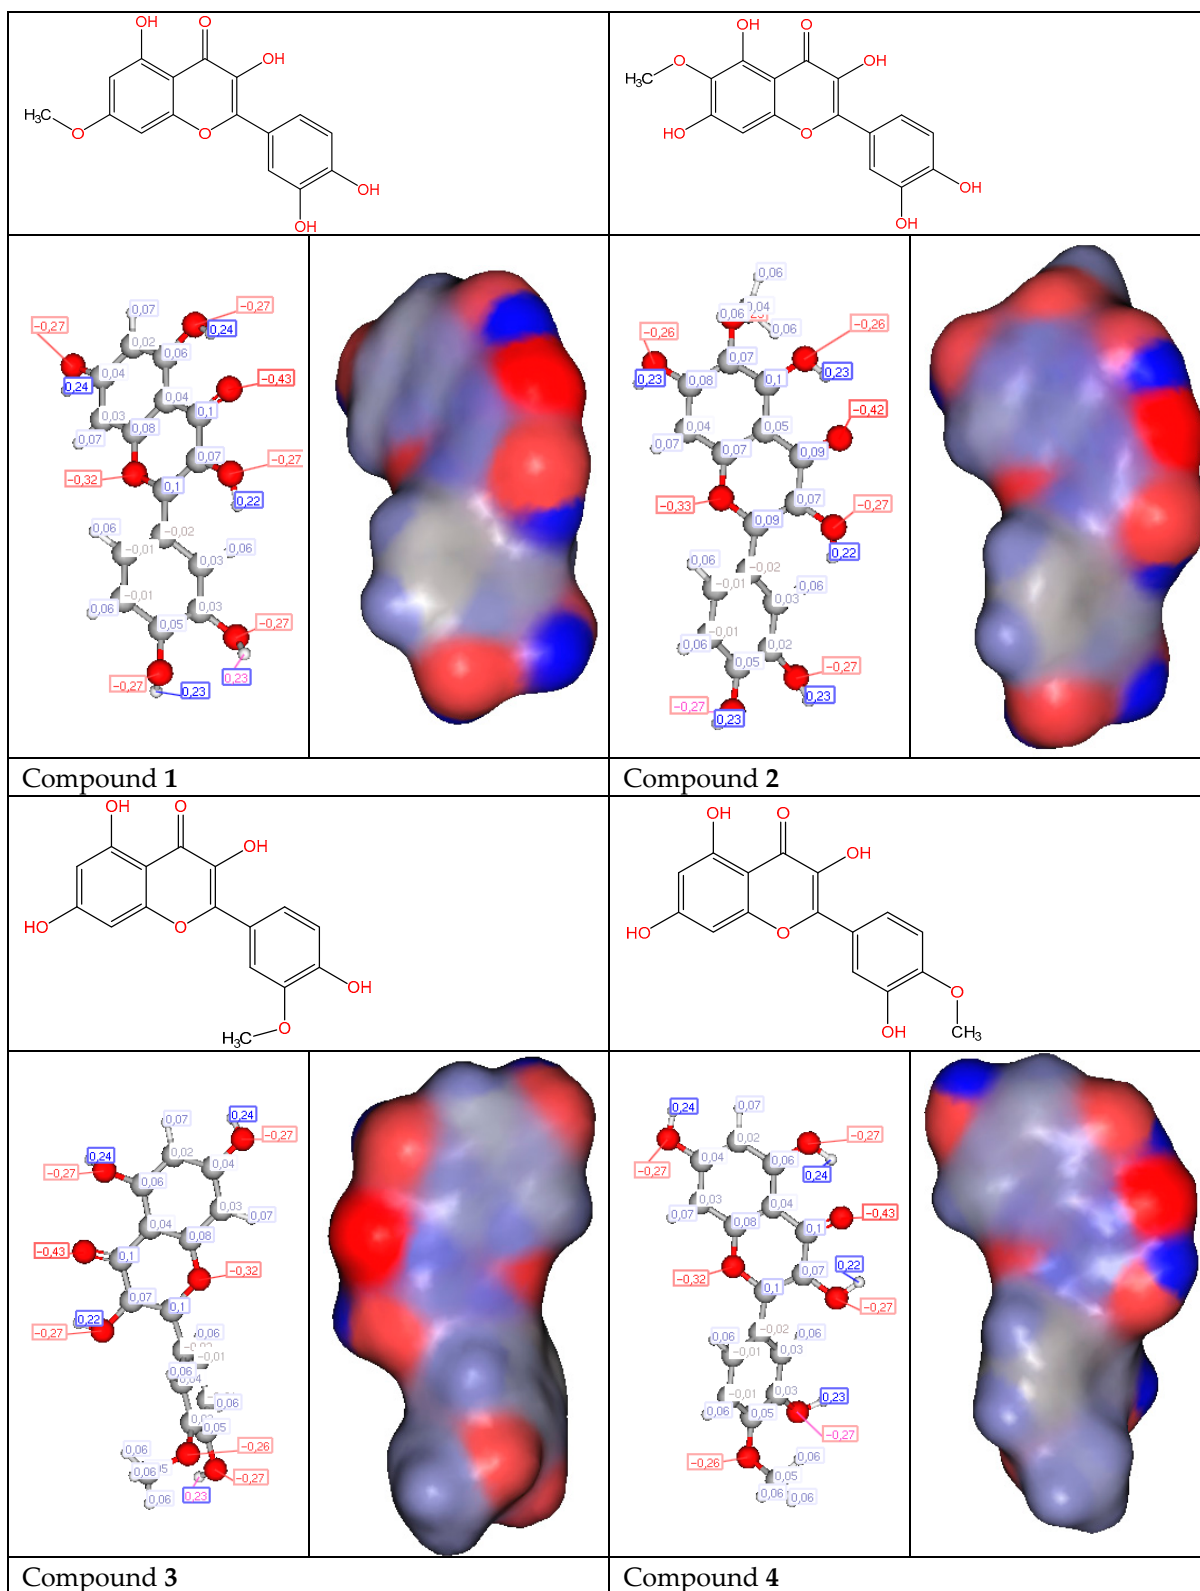

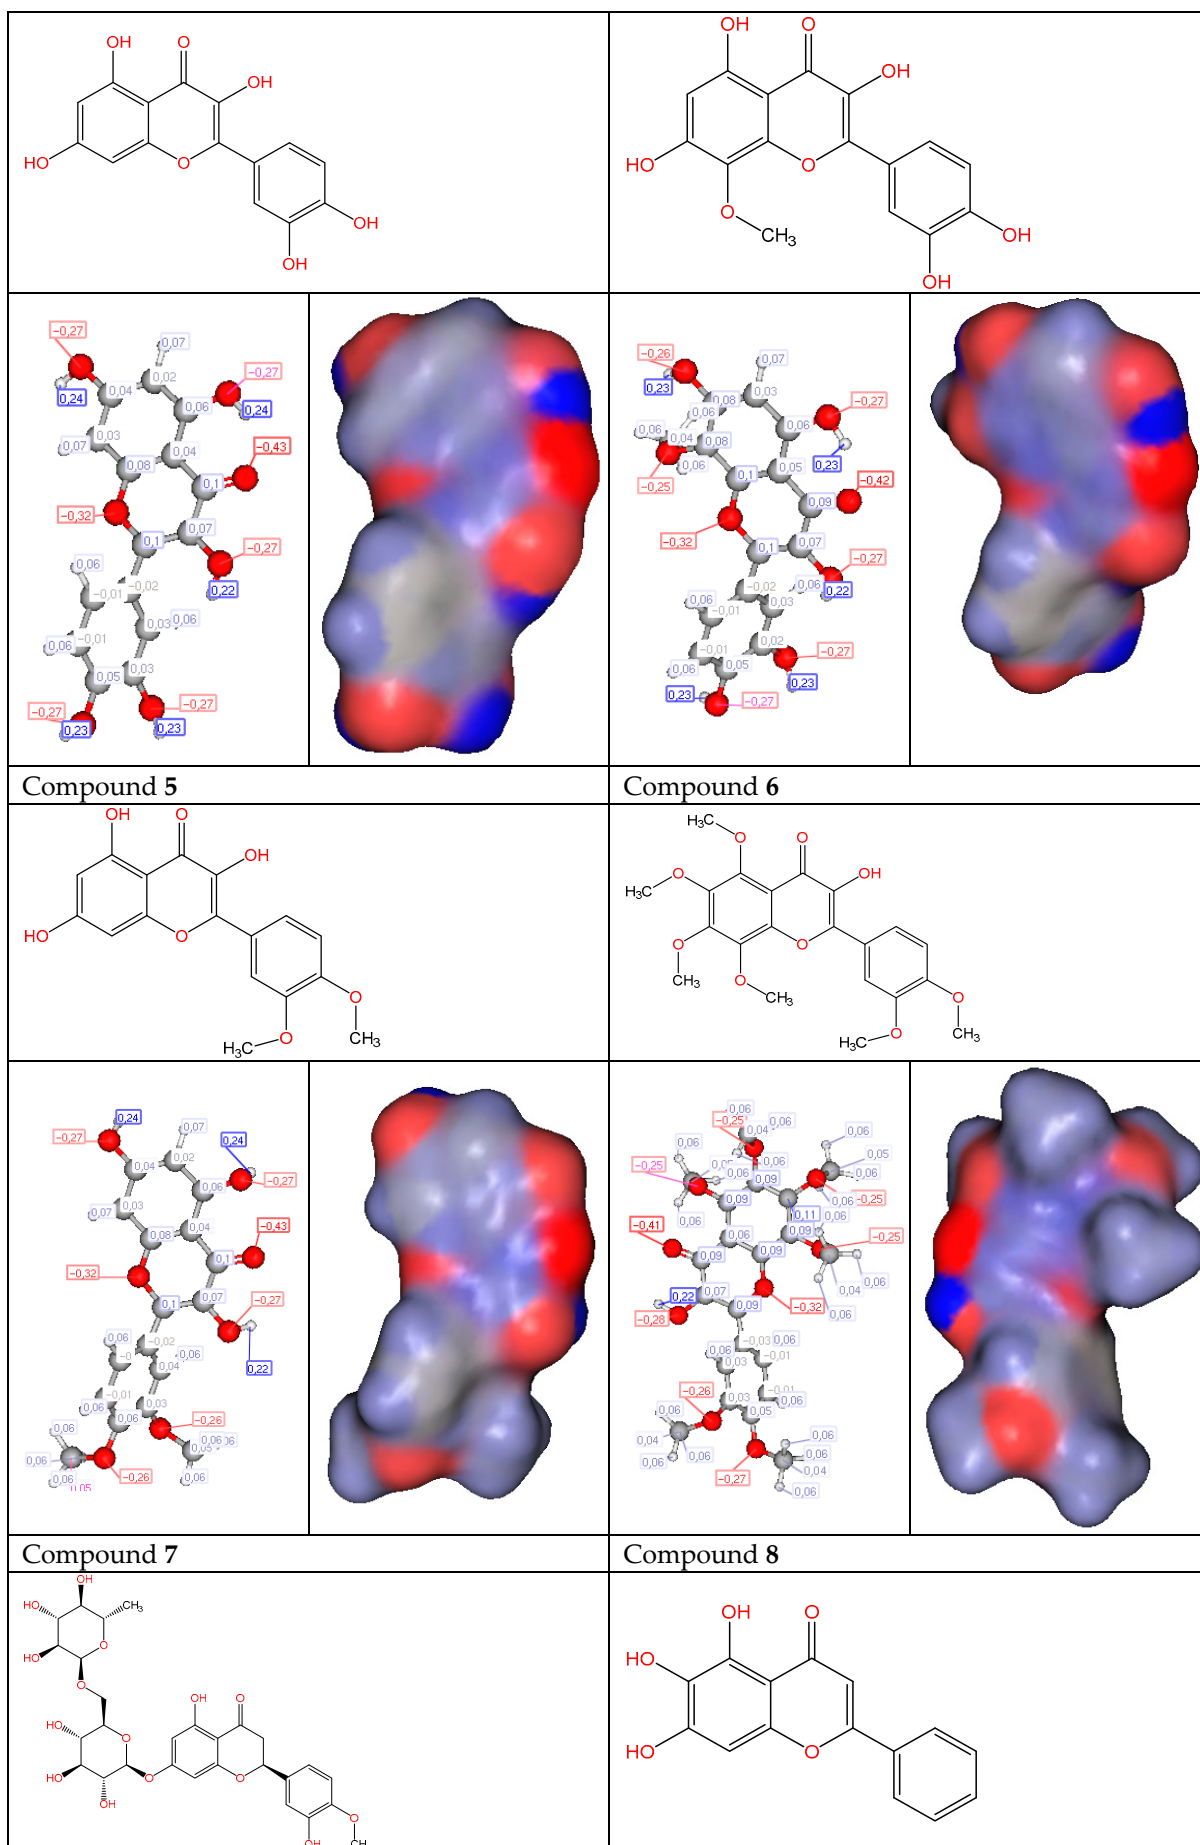

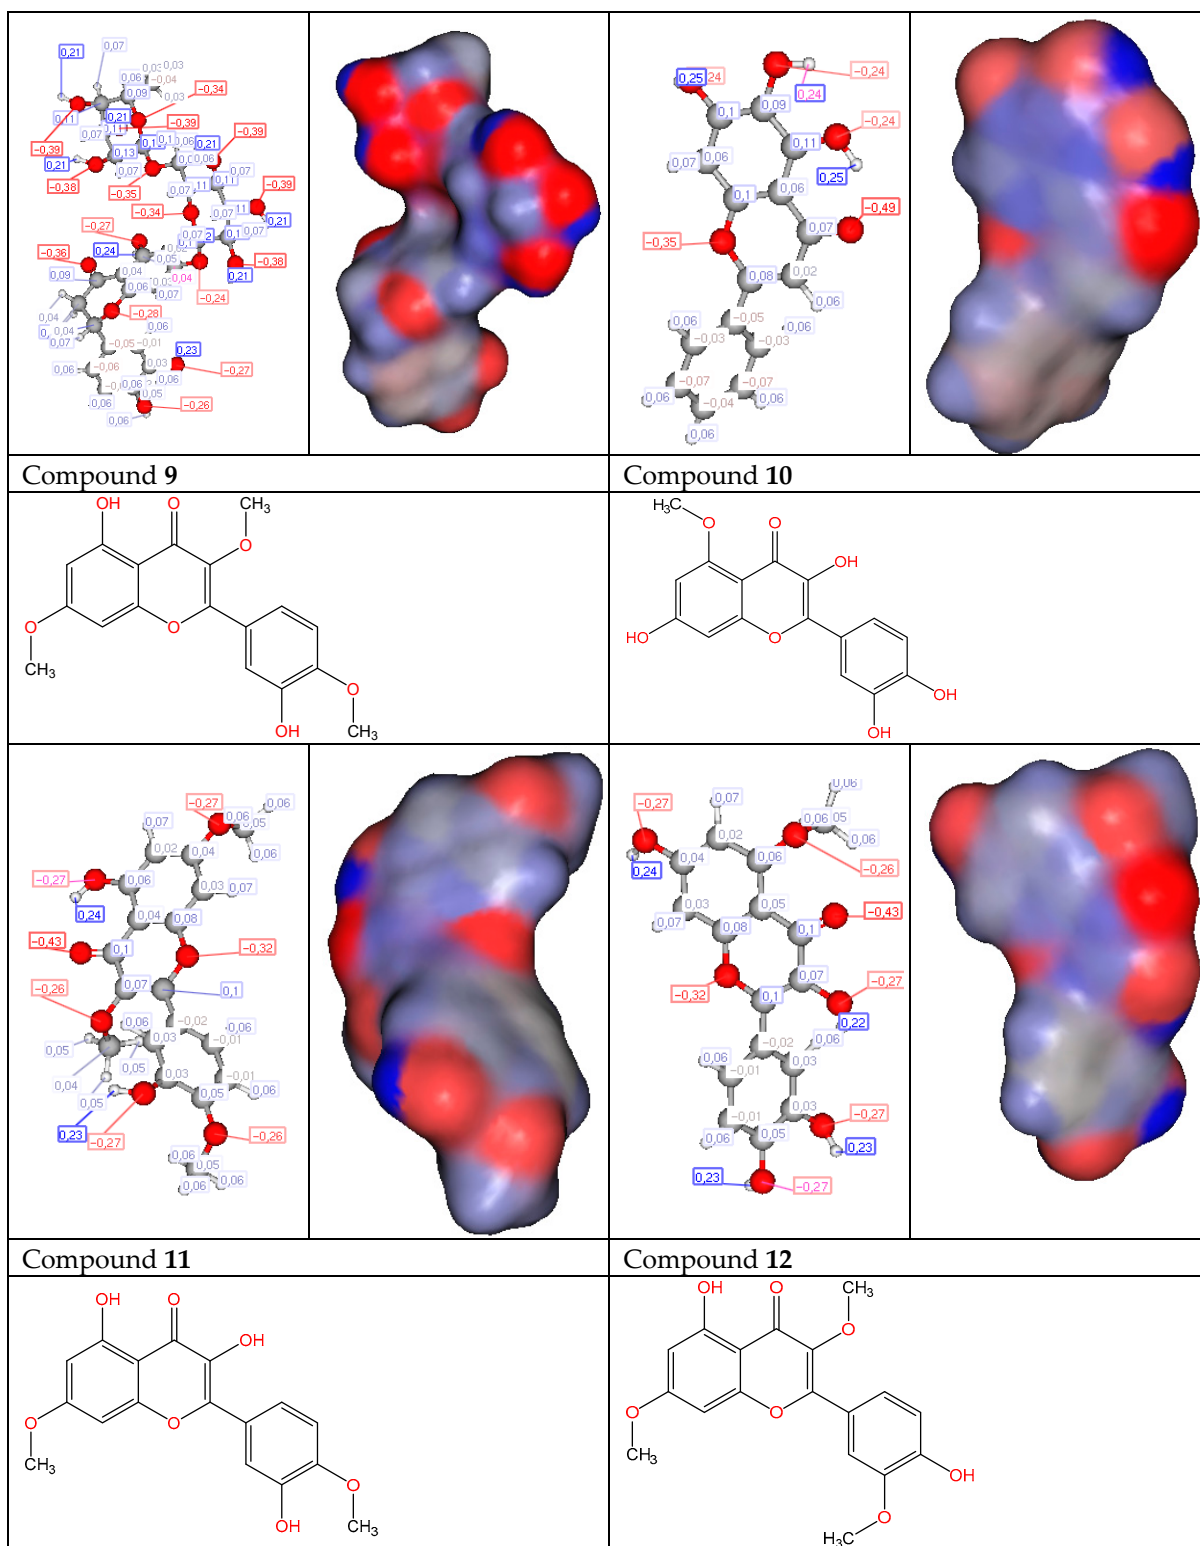





|                                                                                   |                                                                                   |                                                                                                                                                                                                                                              |
|-----------------------------------------------------------------------------------|-----------------------------------------------------------------------------------|----------------------------------------------------------------------------------------------------------------------------------------------------------------------------------------------------------------------------------------------|
| 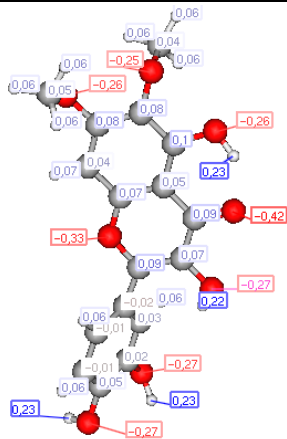 |  | <p> <math>O \delta^-</math><br/> <math>O' \delta^-</math> : Antiviral Pharmacophore Site<br/> <math>d(O \cdots O') = 2.8-3.2 \text{ \AA}</math><br/> <math>d(O' \cdots O'') = 2.8-3.2 \text{ \AA}</math><br/> <math>O'' \delta^-</math> </p> |
| Compound 17                                                                       | Topology of antiviral pharmacophore site of 1-17                                  |                                                                                                                                                                                                                                              |

**Figure S2.** Atomic charge calculations for compounds 1-17.
